# Supplementary material for: Association between body mass index, weight loss and the chance of pregnancy in women with polycystic ovary syndrome and overweight or obesity: a retrospective cohort study in the UK
Source: PubMed Central journal article supplement — Hum Reprod. 2023 Jan 13;38(3):471–81. doi: 10.1093/humrep/deac267 (PMC9977115; doi:10.1093/humrep/deac267), 2023-01-13
Supplement: deac267_supplementary_figure_s1.pdf [file deac267_supplementary_figure_s1.pdf]

human reproduction SUPPLEMENTARY DATA

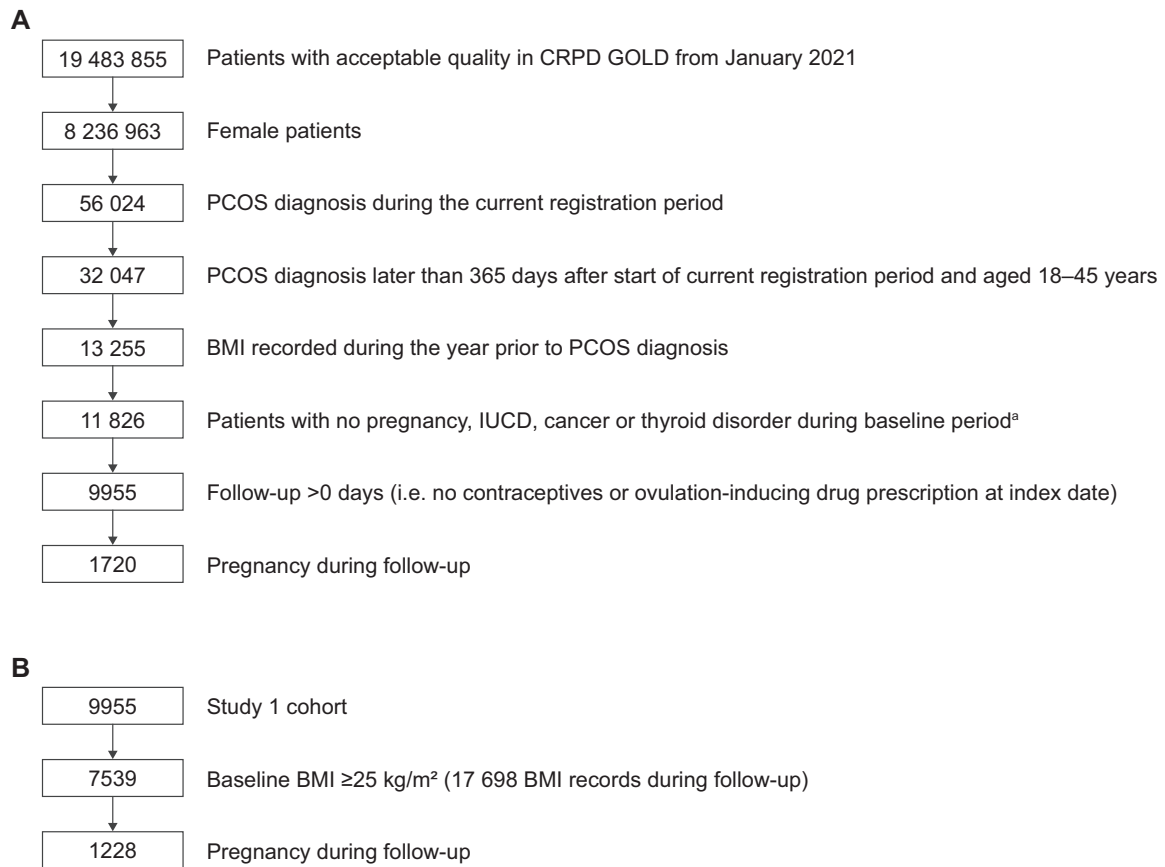

**Supplementary Figure S1. Flow diagram for Study 1 (association between BMI and chance of pregnancy) (A) and Study 2 (association between weight loss and chance of pregnancy) (B).** CPRD GOLD, Clinical Practice Research Datalink GOLD database; IUCD, intrauterine contraceptive device; PCOS, polycystic ovary syndrome. <sup>a</sup>Patients were excluded if they were pregnant (n = 1129) and/or had an IUCD (n = 188), cancer (n = 6), or thyroid disorder (n = 169) during the baseline period.
