# Supplementary material for: Association between body mass index, weight loss and the chance of pregnancy in women with polycystic ovary syndrome and overweight or obesity: a retrospective cohort study in the UK
Source: PubMed Central journal article supplement — Hum Reprod. 2023 Jan 13;38(3):471–81. doi: 10.1093/humrep/deac267 (PMC9977115; doi:10.1093/humrep/deac267), 2023-01-13
Supplement: deac267_supplementary_figure_s2.pdf [file deac267_supplementary_figure_s2.pdf]

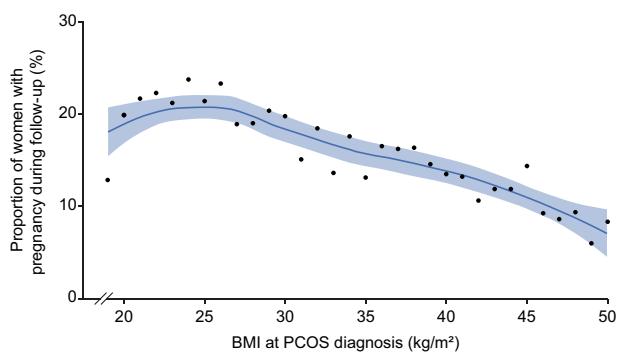

**Supplementary Figure S2. Proportion of women with a pregnancy during the follow-up period by BMI at the time of polycystic ovary syndrome (PCOS) diagnosis.** Analysis performed using data from the Study I cohort (N = 9955), which was sampled to evaluate the association between BMI and chance of pregnancy. The dots are observed proportions of women with pregnancies for the indicated BMI at PCOS diagnosis. The blue line is a fitted trendline, with 95% CIs indicated by the grey shaded area.
