# Supplementary material for: Association between body mass index, weight loss and the chance of pregnancy in women with polycystic ovary syndrome and overweight or obesity: a retrospective cohort study in the UK
Source: PubMed Central journal article supplement — Hum Reprod. 2023 Jan 13;38(3):471–81. doi: 10.1093/humrep/deac267 (PMC9977115; doi:10.1093/humrep/deac267), 2023-01-13
Supplement: deac267_supplementary_figure_s4.pdf [file deac267_supplementary_figure_s4.pdf]

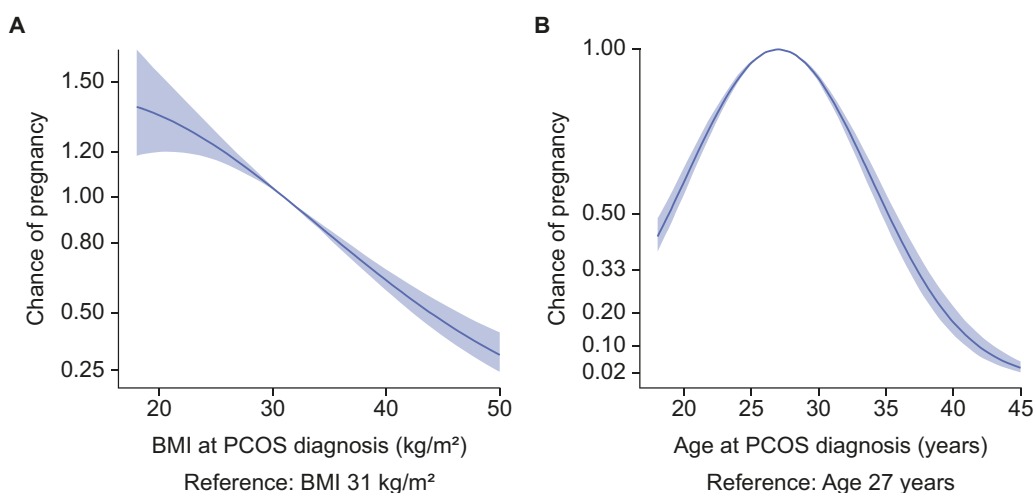

**Supplementary Figure S4. Plot of the effect of BMI (A) and age (B) at polycystic ovary syndrome (PCOS) diagnosis as continuous variables on estimated chance of pregnancy.** Analysis performed using data from the Study I cohort (N = 9955), which was sampled to evaluate the association between BMI and chance of pregnancy. The line on Plot A shows the chance of pregnancy with 95% CI (shaded area), as estimated by the Cox proportional hazard model including baseline BMI as a continuous variable, using BMI of 31 kg/m<sup>2</sup> as the reference. Glycaemic status, quadratic terms for both BMI and age, and an interaction term between BMI and age were included as covariates. Plot B shows the effect of age as a continuous variable on chance of pregnancy, using age of 27 years as the reference.
