# Supplementary material for: Association between body mass index, weight loss and the chance of pregnancy in women with polycystic ovary syndrome and overweight or obesity: a retrospective cohort study in the UK
Source: PubMed Central journal article supplement — Hum Reprod. 2023 Jan 13;38(3):471–81. doi: 10.1093/humrep/deac267 (PMC9977115; doi:10.1093/humrep/deac267), 2023-01-13
Supplement: deac267_supplementary_figure_s5.pdf [file deac267_supplementary_figure_s5.pdf]

human reproduction SUPPLEMENTARY DATA

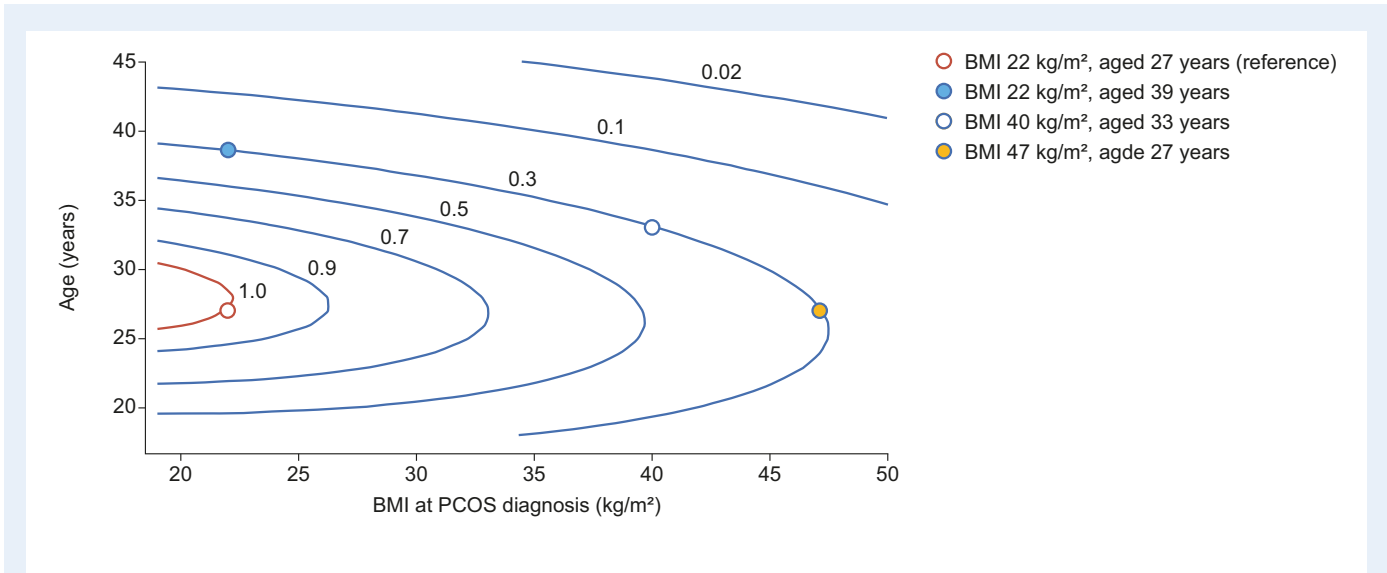

**Supplementary Figure S5. 2D contour plot showing estimated relative chance of pregnancy by BMI and age.** Analysis performed using data from the Study I cohort (N = 9955), which was sampled to evaluate the association between BMI and relative chance of pregnancy. The contour plot illustrates combinations of BMI (x-axis) and age (y-axis) that share equal chances of pregnancy, as shown by the contour lines on the graph and labelled chance of pregnancy, as estimated by the Cox proportional hazard model including baseline BMI as a continuous variable and using a BMI of 22 kg/m<sup>2</sup> and age of 27 years as reference. Glycaemic status, quadratic terms for both BMI and age, and an interaction term between BMI and age were included as covariates. The three examples on the 0.3 line represent women with BMI/age combinations that share a 30% chance of pregnancy compared with a reference woman aged 27 years with a BMI of 22 kg/m<sup>2</sup>. PCOS, polycystic ovary syndrome.
