# Supplementary material for: Association between body mass index, weight loss and the chance of pregnancy in women with polycystic ovary syndrome and overweight or obesity: a retrospective cohort study in the UK
Source: PubMed Central journal article supplement — Hum Reprod. 2023 Jan 13;38(3):471–81. doi: 10.1093/humrep/deac267 (PMC9977115; doi:10.1093/humrep/deac267), 2023-01-13
Supplement: deac267_supplementary_table_si.pdf [file deac267_supplementary_table_si.pdf]

**human reproduction** **SUPPLEMENTARY DATA**

**Supplementary Table SI** Reasons for record censoring in the Study I cohort, which was sampled to evaluate the association between BMI and chance of pregnancy.

|                                                  | BMI category (kg/m <sup>2</sup> ) |                                   |                                       |                                            |                                             |                                        |
|--------------------------------------------------|-----------------------------------|-----------------------------------|---------------------------------------|--------------------------------------------|---------------------------------------------|----------------------------------------|
|                                                  | Total<br>N = 9955                 | Normal<br>(18.5–24.9)<br>N = 2362 | Overweight<br>(25.0–29.9)<br>N = 2068 | Obesity class I<br>(30.0–34.9)<br>N = 2129 | Obesity class II<br>(35.0–39.9)<br>N = 1768 | Obesity class III<br>(≥40)<br>N = 1628 |
| Pregnancy, n (%)                                 | 1720 (17.3)                       | 492 (20.8)                        | 418 (20.2)                            | 355 (16.7)                                 | 272 (15.4)                                  | 183 (11.2)                             |
| Prescription for contraceptives, n (%)           | 3645 (36.6)                       | 974 (41.2)                        | 826 (39.9)                            | 796 (37.4)                                 | 596 (33.7)                                  | 453 (27.8)                             |
| Prescription for ovulation-inducing drugs, n (%) | 342 (3.4)                         | 113 (4.8)                         | 76 (3.7)                              | 68 (3.2)                                   | 62 (3.5)                                    | 23 (1.4)                               |
| Record end, n (%)                                | 2406 (24.2)                       | 578 (24.5)                        | 442 (21.4)                            | 518 (24.3)                                 | 423 (23.9)                                  | 445 (27.3)                             |
| Study end, n (%)                                 | 2184 (21.9)                       | 318 (13.5)                        | 382 (18.5)                            | 460 (21.6)                                 | 477 (27.0)                                  | 547 (33.6)                             |
