# Supplementary material for: Association between body mass index, weight loss and the chance of pregnancy in women with polycystic ovary syndrome and overweight or obesity: a retrospective cohort study in the UK
Source: PubMed Central journal article supplement — Hum Reprod. 2023 Jan 13;38(3):471–81. doi: 10.1093/humrep/deac267 (PMC9977115; doi:10.1093/humrep/deac267), 2023-01-13
Supplement: deac267_supplementary_table_sii.pdf [file deac267_supplementary_table_sii.pdf]

**Supplementary Table S11** Baseline biomarker levels for women in the Study I cohort, which was sampled to evaluate the association between BMI and chance of pregnancy, with a measurement taken during the baseline year prior to polycystic ovary syndrome (PCOS) diagnosis.

|                                | BMI category (kg/m <sup>2</sup> ) |                                   |                                       |                                            |                                             |                                        |
|--------------------------------|-----------------------------------|-----------------------------------|---------------------------------------|--------------------------------------------|---------------------------------------------|----------------------------------------|
|                                | Total<br>N = 9955                 | Normal<br>(18.5–24.9)<br>N = 2362 | Overweight<br>(25.0–29.9)<br>N = 2068 | Obesity class I<br>(30.0–34.9)<br>N = 2129 | Obesity class II<br>(35.0–39.9)<br>N = 1768 | Obesity class III<br>(≥40)<br>N = 1628 |
| Glycated haemoglobin, %        | 5.4 (5.2–5.8)<br>[n = 1364]       | 5.3 (5.1–5.6)<br>[n = 192]        | 5.4 (5.1–5.6)<br>[n = 227]            | 5.4 (5.2–5.8)<br>[n = 309]                 | 5.5 (5.3–5.9)<br>[n = 287]                  | 5.6 (5.4–6.0)<br>[n = 349]             |
| Systolic blood pressure, mmHg  | 120.0 (112.0–130.0)<br>[n = 6728] | 114.0 (108.0–121.0)<br>[n = 1669] | 120.0 (110.0–126.5)<br>[n = 1417]     | 121.0 (114.5–130.0)<br>[n = 1415]          | 125.0 (118.0–133.8)<br>[n = 1156]           | 130.0 (120.0–138.2)<br>[n = 1071]      |
| Diastolic blood pressure, mmHg | 77.0 (70.0–82.7)<br>[n = 6726]    | 70.0 (66.7–77.0)<br>[n = 1668]    | 75.0 (70.0–80.0)<br>[n = 1417]        | 78.0 (70.5–82.7)<br>[n = 1415]             | 80.0 (74.0–86.0)<br>[n = 1156]              | 82.0 (77.0–88.5)<br>[n = 1070]         |
| HDL-cholesterol, mmol/l        | 1.2 (1.0–1.5)<br>[n = 1782]       | 1.6 (1.4–1.9)<br>[n = 267]        | 1.4 (1.1–1.6)<br>[n = 290]            | 1.2 (1.0–1.5)<br>[n = 393]                 | 1.2 (1.0–1.3)<br>[n = 387]                  | 1.1 (1.0–1.3)<br>[n = 445]             |
| LDL-cholesterol, mmol/l        | 2.9 (2.4–3.5)<br>[n = 1528]       | 2.5 (2.0–3.0)<br>[n = 228]        | 2.9 (2.4–3.4)<br>[n = 250]            | 2.9 (2.4–3.5)<br>[n = 347]                 | 2.9 (2.5–3.6)<br>[n = 324]                  | 3.0 (2.5–3.6)<br>[n = 379]             |
| Total cholesterol, mmol/l      | 4.7 (4.2–5.4)<br>[n = 2153]       | 4.5 (4.0–5.0)<br>[n = 336]        | 4.7 (4.2–5.4)<br>[n = 361]            | 4.9 (4.3–5.5)<br>[n = 475]                 | 4.8 (4.2–5.5)<br>[n = 460]                  | 4.8 (4.3–5.5)<br>[n = 521]             |
| Triglycerides, mmol/l          | 1.3 (0.9–1.9)<br>[n = 1692]       | 0.8 (0.6–1.1)<br>[n = 241]        | 1.1 (0.8–1.6)<br>[n = 280]            | 1.3 (0.9–1.9)<br>[n = 389]                 | 1.4 (1.0–2.0)<br>[n = 364]                  | 1.6 (1.1–2.2)<br>[n = 418]             |

Data are presented as medians (quartile 1–quartile 3). Values in square brackets are number of women with the respective biomarker measurement during the 12-month baseline period prior to the date of PCOS diagnosis.

HDL, high-density lipoprotein; LDL, low-density lipoprotein.
