# Supplementary material for: Association between body mass index, weight loss and the chance of pregnancy in women with polycystic ovary syndrome and overweight or obesity: a retrospective cohort study in the UK
Source: PubMed Central journal article supplement — Hum Reprod. 2023 Jan 13;38(3):471–81. doi: 10.1093/humrep/deac267 (PMC9977115; doi:10.1093/humrep/deac267), 2023-01-13
Supplement: deac267_supplementary_table_siii.pdf [file deac267_supplementary_table_siii.pdf]

**Supplementary Table SIII Estimated association between body weight change and covariates and the chance of pregnancy.**

|                             | HR (95% CI)         | P-value |
|-----------------------------|---------------------|---------|
| Body weight change          | 0.96 (0.95–0.97)    | <0.0001 |
| Baseline BMI                | 0.94 (0.93–0.95)    | <0.0001 |
| Age, years                  |                     |         |
| 18–24                       | 0.65 (0.57–0.74)    | <0.0001 |
| 25–29 (reference)           | 1.00 (1.00–1.00)    | NA      |
| 30–35                       | 0.74 (0.64–0.86)    | <0.0001 |
| 36–45                       | 0.26 (0.20–0.33)    | <0.0001 |
| Glycaemic status            | 0.74 (0.53–1.04)    | 0.083   |
| Weight change: baseline BMI | 0.998 (0.997–1.000) | 0.013   |

Analysis performed using data from the Study 2 cohort (N = 7593), which was sampled to evaluate the association between weight loss and chance of pregnancy. Data presented are the hazard ratios for pregnancy for the covariates in the Cox proportional hazards model used to evaluate the association between change in body weight (BMI) and chance of pregnancy. The main covariate was change of BMI relative to baseline BMI, modelled as a time-varying covariate. Additional covariates were: baseline BMI; glycaemic status; baseline age, as a categorical variable based on four categories (18–24, 25–29 (reference age), 30–35 and 36–45 years); and an interaction term between the change in BMI and the baseline BMI. NA, not applicable.
